# Supplementary material for: FAM83F regulates canonical Wnt signalling through an interaction with CK1α
Source: PubMed Central journal article supplement (PMC7768192; doi:10.26508/lsa.202000805), 2020-12-24

**Figure 4B.**

INPUT

IP ELUTE

HCT116 - WT

HCT116 - F KO

DLD1 - WT

DLD1 - F KO

HCT116 - WT

HCT116 - F KO

DLD1 - WT

DLD1 - F KO

Wnt3a (6h)

- + - + - + - +

Wnt3a (6h)

- + - + - + - +

100-  
70-  
55-

- FAM83F

55-  
35-

- CK1 alpha

- IgG

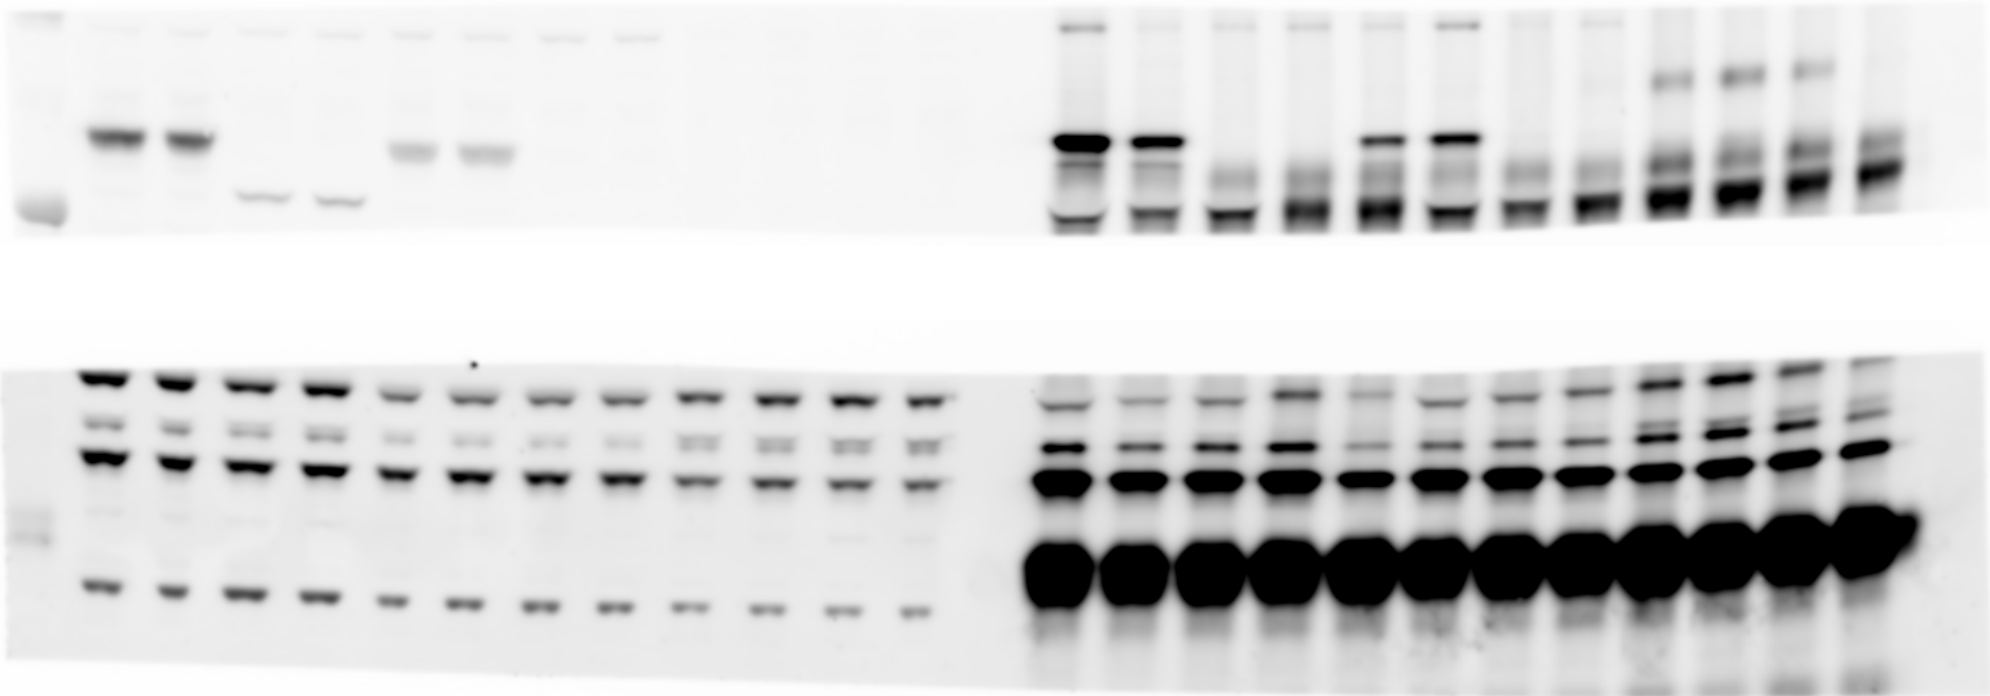

**Figure 4B.**

INPUT

IP ELUTE

HCT116 - WT

HCT116 - F KO

DLD1 - WT

DLD1 - F KO

HCT116 - WT

HCT116 - F KO

DLD1 - WT

DLD1 - F KO

Wnt3a (6h)

-

+

-

+

-

+

-

+

Wnt3a (6h)

-

+

-

+

-

+

-

+

130-

100-

- FAM83G

35-

- GAPDH

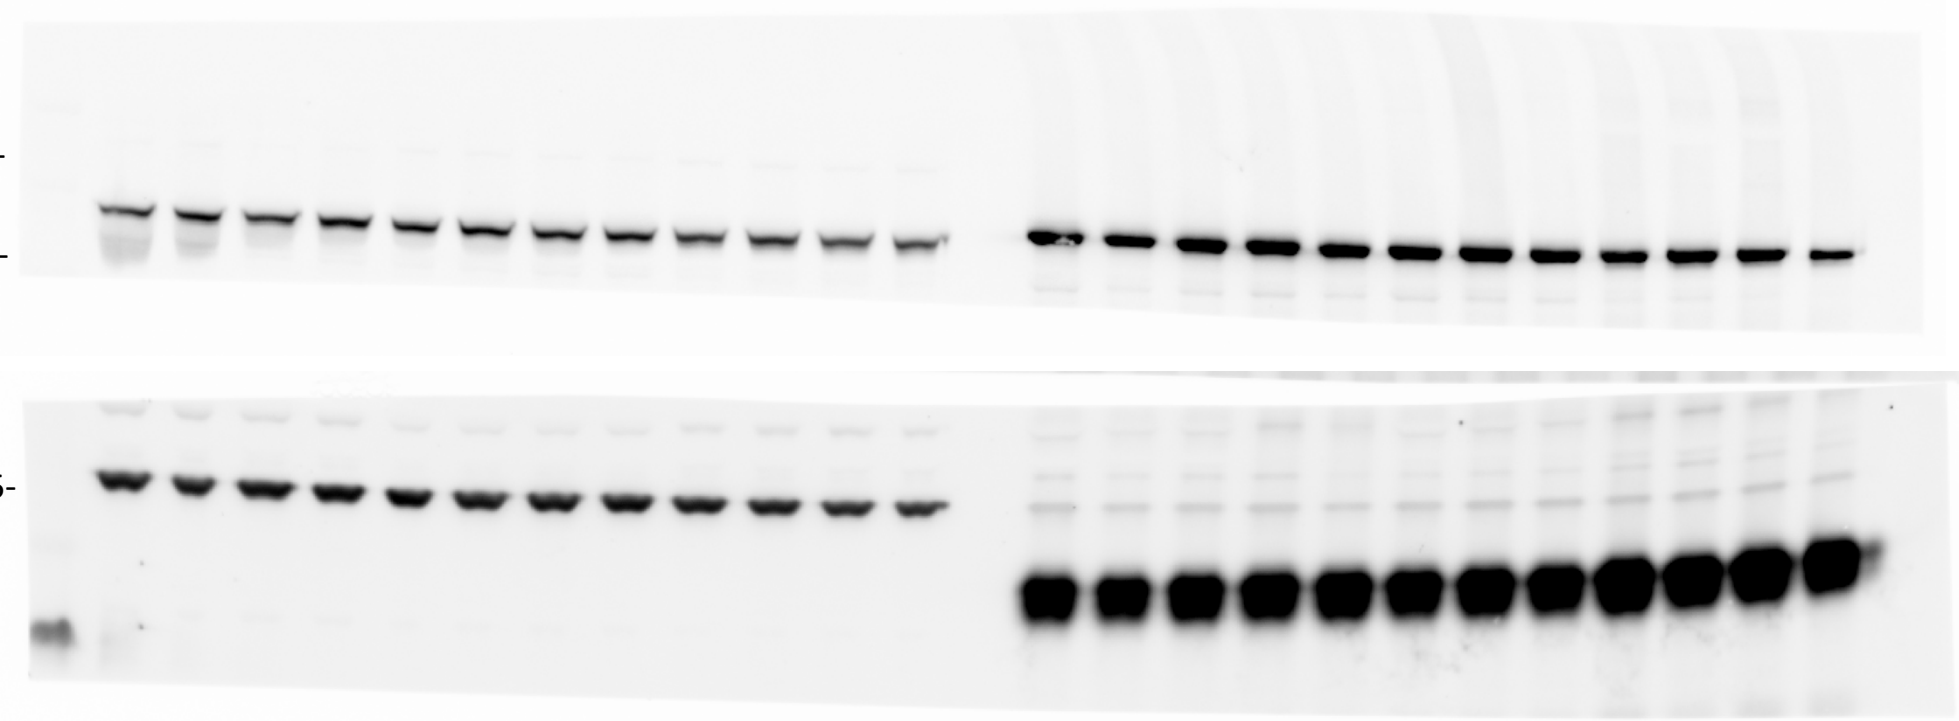

Figure 4C.

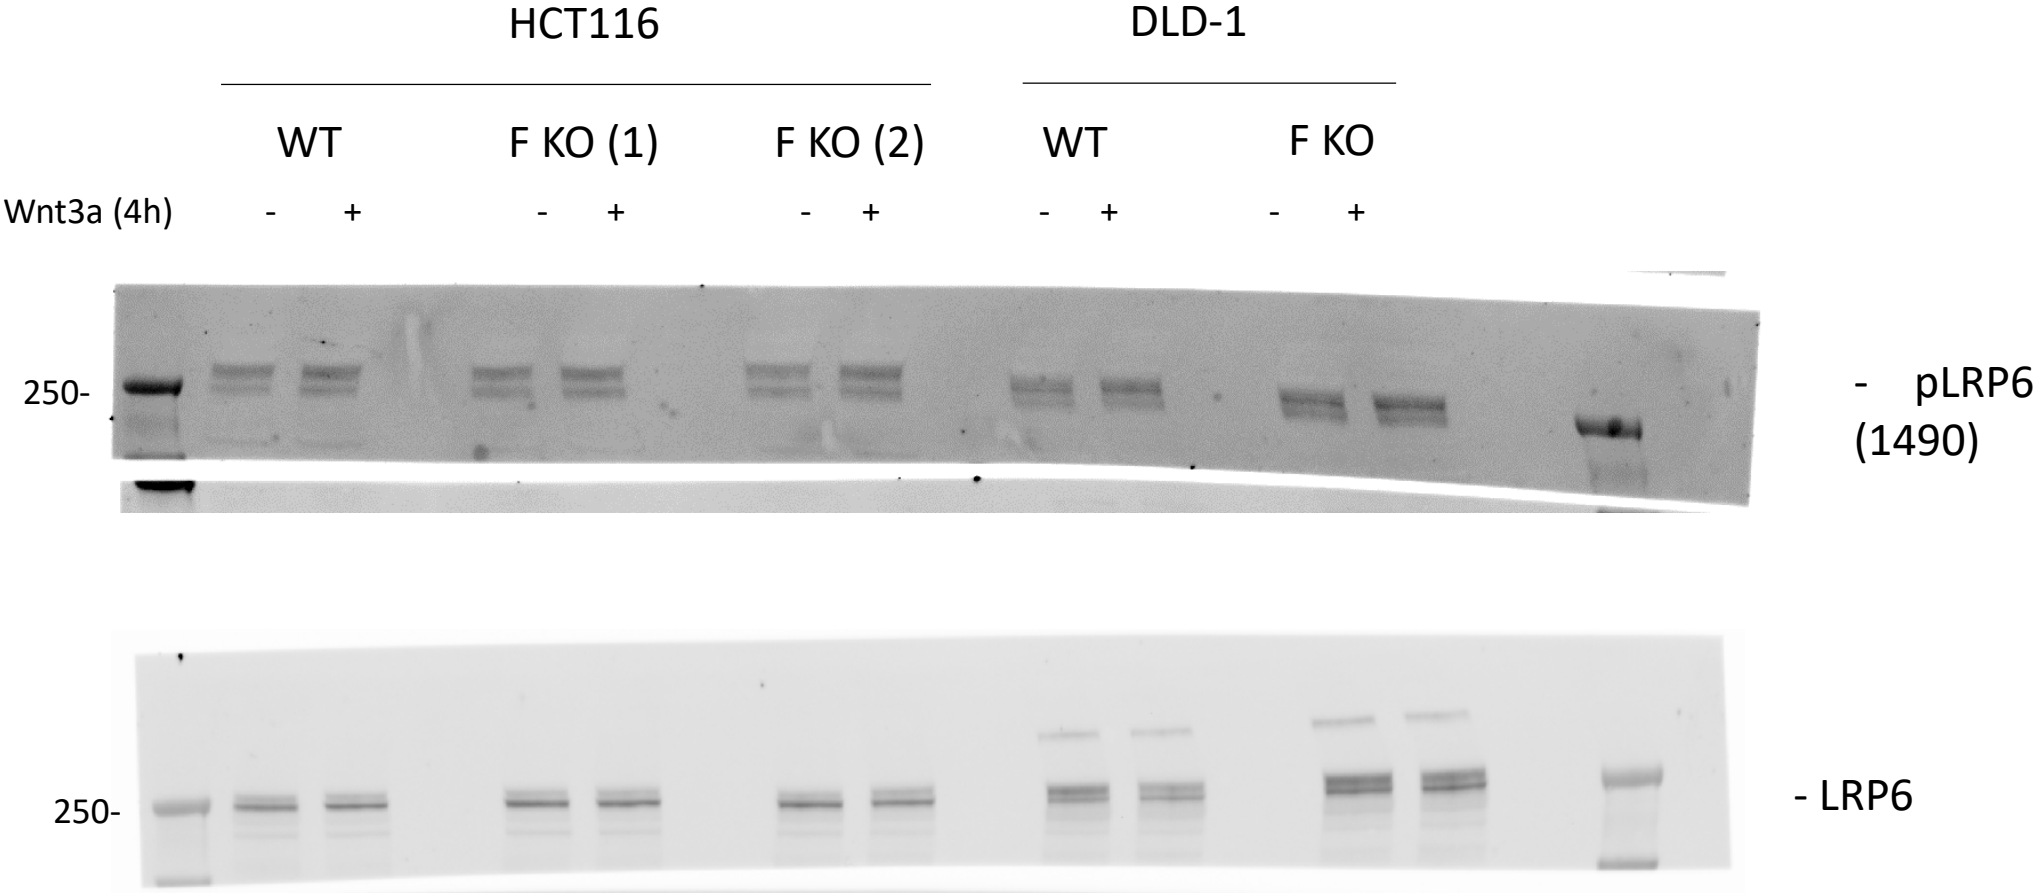

Figure 4C.

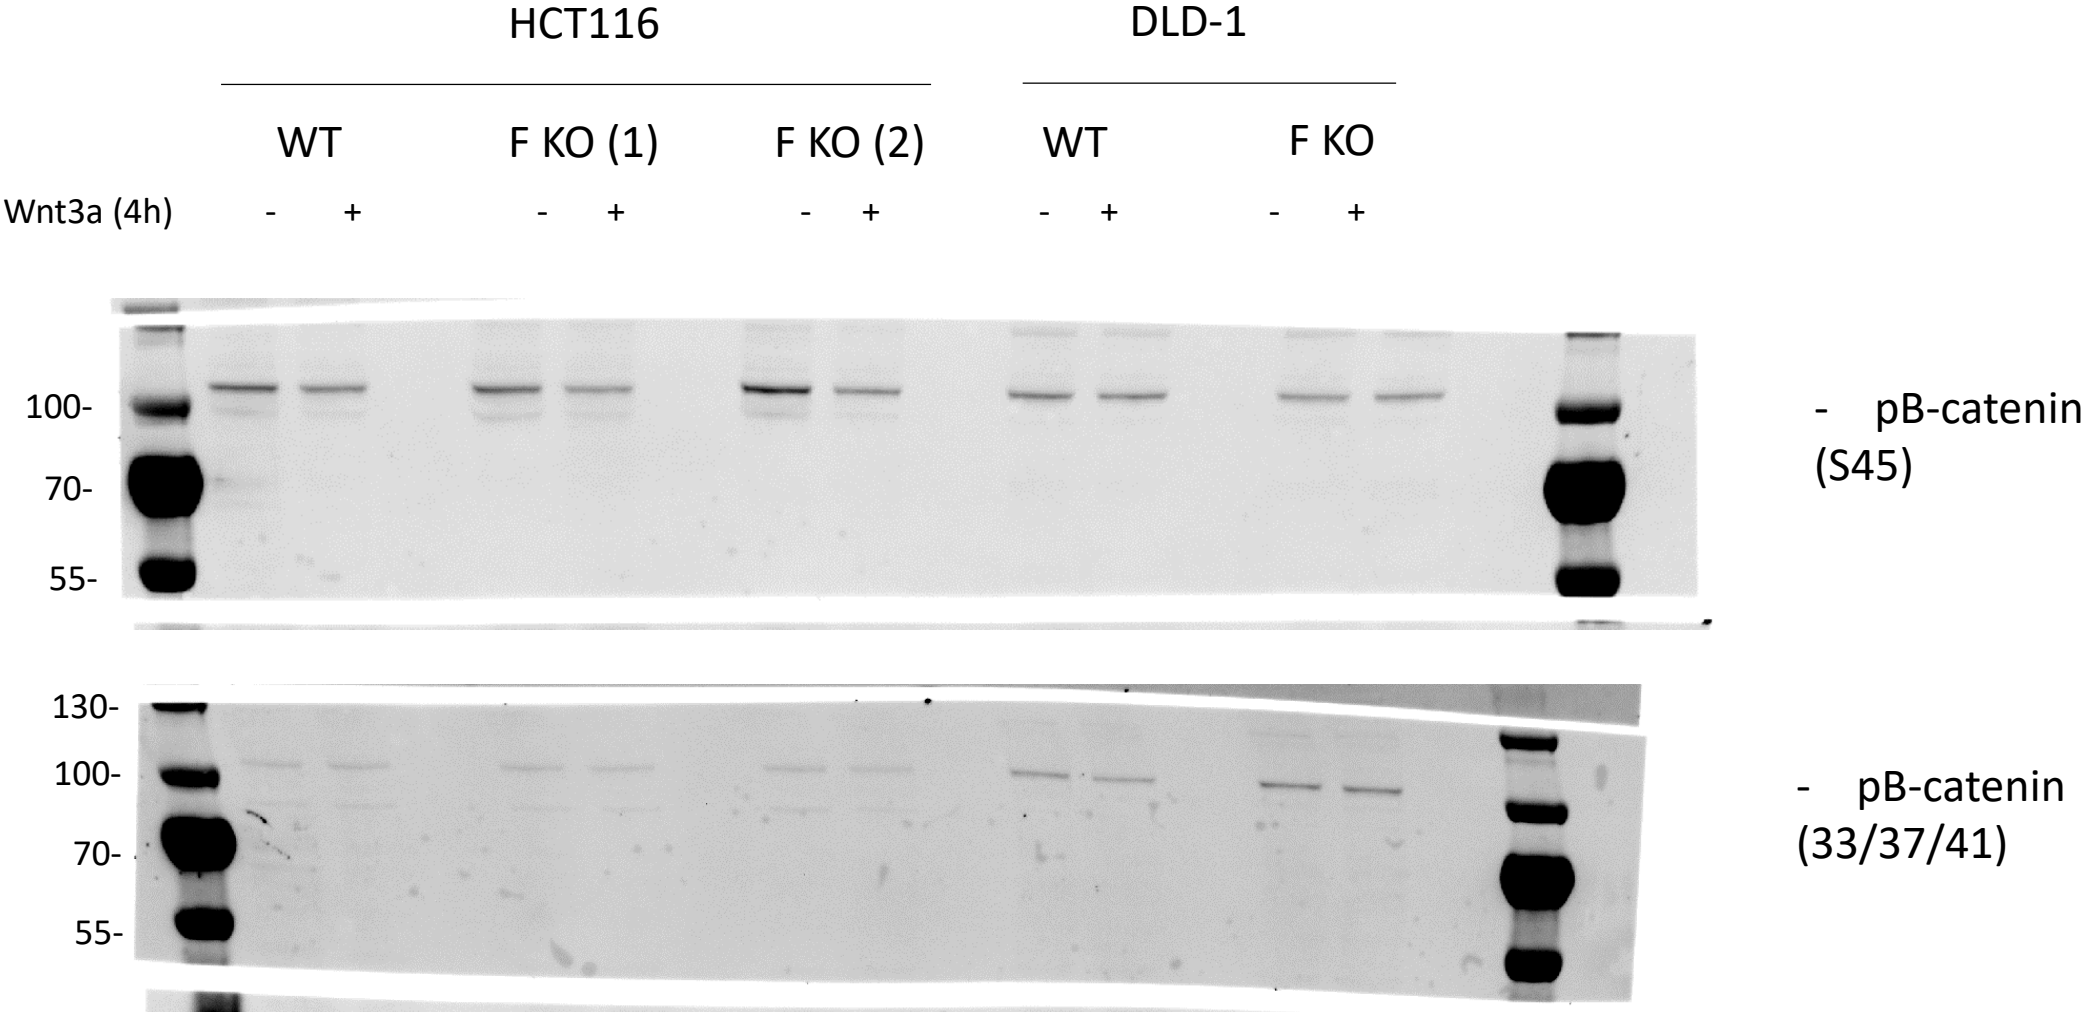

Supplement: LSA-2020-00805_SdataF4.pdf [file LSA-2020-00805_SdataF4.pdf]
